# Supplementary material for: Identification of Candidate Genes Associated with Trichothecene Biosynthesis in Fusarium graminearum Species Complex Combined with Transcriptomic and Proteomic Analysis
Source: MDPI journal article supplement (doi:10.3390/microorganisms10081479), 2022-07-22
Supplement: s1 [file s1]

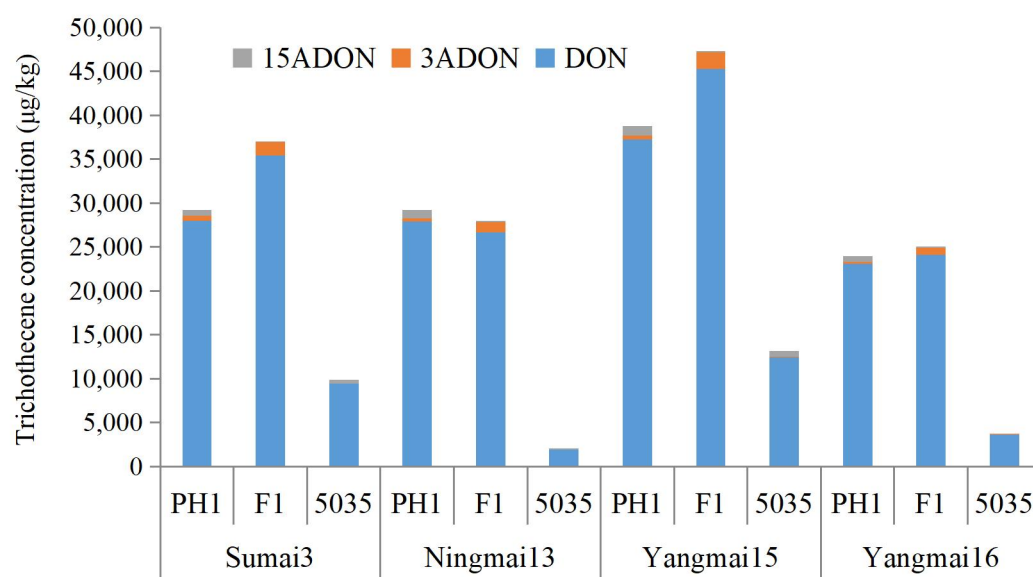

**Figure S2.** Trichothecenes produced in wheat heads on wheat cultivars Sumai3, Ningmai13, Yangmai15, and Yangmai16.
