# Supplementary material for: Identification of Candidate Genes Associated with Trichothecene Biosynthesis in Fusarium graminearum Species Complex Combined with Transcriptomic and Proteomic Analysis
Source: Microorganisms. 2022 Jul 22;10(8):1479. doi: 10.3390/microorganisms10081479 (PMC9332169; doi:10.3390/microorganisms10081479)
Supplement: Supplementary file 1 [file microorganisms-10-01479-s001.zip]

Archive with 9 entries (9 files):
- Figure S1.pdf
- Figure S2.pdf
- Figure S3.pdf
- Figure S4.pdf
- Figure S5.pdf
- Table S1.xlsx
- Table S2.xls
- Table S3.xls
- Table S4.xls
