# Supplementary material for: Identification of Candidate Genes Associated with Trichothecene Biosynthesis in Fusarium graminearum Species Complex Combined with Transcriptomic and Proteomic Analysis
Source: Microorganisms. 2022 Jul 22;10(8):1479. doi: 10.3390/microorganisms10081479 (PMC9332169; doi:10.3390/microorganisms10081479)
Supplement: Supplementary file 1 [file microorganisms-10-01479-s001.zip › Table S1.xlsx]

## Sheet: BP F1 v.s. 5035
Biological process of F1 versus 5035
The enriched GO terms	p-value	overlap(number of annotated genes)
GO:0055085 transmembrane transport	3.43446e-05	39
GO:0007155 cell adhesion	0.0042488	3
GO:0009072 aromatic amino acid family metabolic process	0.0114115	2
GO:0035434 copper ion transmembrane transport	0.0114115	2
GO:0016042 lipid catabolic process	0.0116203	3
GO:0003333 amino acid transmembrane transport	0.0130273	6
GO:0045493 xylan catabolic process	0.0167242	2
GO:0005975 carbohydrate metabolic process	0.0203028	16
GO:0055114 oxidation-reduction process	0.0294757	47
GO:0006030 chitin metabolic process	0.0350694	1
GO:0006661 phosphatidylinositol biosynthetic process	0.0350694	1
GO:0015840 urea transport	0.0350694	1
GO:0015847 putrescine transport	0.0350694	1
GO:0015848 spermidine transport	0.0350694	1
GO:0042883 cysteine transport	0.0350694	1
GO:0071918 urea transmembrane transport	0.0350694	1
GO:0009116 nucleoside metabolic process	0.0354857	3
GO:0009405 pathogenesis	0.0457527	2
GO:0006865 amino acid transport	0.0500422	3
GO:0006306 DNA methylation	0.0689149	1
GO:0019354 siroheme biosynthetic process	0.0689149	1
GO:0006464 cellular protein modification process	0.0740592	2
GO:0008152 metabolic process	0.100543	58
GO:0006014 D-ribose metabolic process	0.101579	1
GO:0006562 proline catabolic process	0.101579	1
GO:0048015 phosphatidylinositol-mediated signaling	0.101579	1
GO:0090502 RNA phosphodiester bond hydrolysis, endonucleolytic	0.106469	2
GO:0006810 transport	0.116766	18
GO:0015696 ammonium transport	0.133102	1
GO:0019439 aromatic compound catabolic process	0.133102	1
GO:0031167 rRNA methylation	0.133102	1
GO:0043419 urea catabolic process	0.133102	1
GO:0072488 ammonium transmembrane transport	0.133102	1
GO:0000271 polysaccharide biosynthetic process	0.163525	1
GO:0006855 drug transmembrane transport	0.163525	1
GO:0019441 tryptophan catabolic process to kynurenine	0.163525	1
GO:0071805 potassium ion transmembrane transport	0.163525	1
GO:0000272 polysaccharide catabolic process	0.172673	3
GO:0006629 lipid metabolic process	0.185821	4
GO:0006817 phosphate ion transport	0.192885	1
GO:0006807 nitrogen compound metabolic process	0.218034	2
GO:0006779 porphyrin-containing compound biosynthetic process	0.22122	1
GO:0009395 phospholipid catabolic process	0.22122	1
GO:0015851 nucleobase transport	0.22122	1
GO:0044262 cellular carbohydrate metabolic process	0.22122	1
GO:0006777 Mo-molybdopterin cofactor biosynthetic process	0.248565	1
GO:0009308 amine metabolic process	0.248565	1
GO:0008299 isoprenoid biosynthetic process	0.30042	1
GO:0046835 carbohydrate phosphorylation	0.30042	1
GO:0006725 cellular aromatic compound metabolic process	0.324997	1
GO:0046854 phosphatidylinositol phosphorylation	0.324997	1
GO:0006032 chitin catabolic process	0.39369	1
GO:0090501 RNA phosphodiester bond hydrolysis	0.39369	1
GO:0030245 cellulose catabolic process	0.435573	1
GO:0023014 signal transduction by phosphorylation	0.455423	1
GO:0035556 intracellular signal transduction	0.455423	1
GO:0006508 proteolysis	0.494636	8
GO:0006812 cation transport	0.50624	2
GO:0006633 fatty acid biosynthetic process	0.52811	1
GO:0000160 phosphorelay signal transduction system	0.54472	1
GO:0006066 alcohol metabolic process	0.576214	1
GO:0030001 metal ion transport	0.658268	1
GO:0032259 methylation	0.681201	3
GO:0006200 ATP catabolic process	0.692464	4
GO:0098655	0.714422	1
GO:0007264 small GTPase mediated signal transduction	0.785788	1
GO:0006184 GTP catabolic process	0.839386	1
GO:0009058 biosynthetic process	0.888002	1
GO:0007165 signal transduction	0.895802	1
GO:0006366 transcription from RNA polymerase II promoter	0.941875	6
GO:0006468 protein phosphorylation	0.943328	2
GO:0006357 regulation of transcription from RNA polymerase II promoter	0.948883	6
GO:0006355 regulation of transcription, DNA-dependent	0.962574	9
GO:0006351 transcription, DNA-dependent	0.996708	3

## Sheet: CC F1 v.s. 5035
Cellular component of F1 versus 5035
The enriched GO terms	p-value	overlap(number of annotated genes)
GO:0016021 integral to membrane	3.59733e-10	50
GO:0005576 extracellular region	0.000332909	7
GO:0016020 membrane	0.000881839	31
GO:0019008 molybdopterin synthase complex	0.100795	1
GO:0009279 cell outer membrane	0.147364	1
GO:0005773 vacuole	0.191551	1
GO:0005774 vacuolar membrane	0.191551	1
GO:0000775 chromosome, centromeric region	0.233476	1
GO:0005886 plasma membrane	0.346799	1
GO:0000139 Golgi membrane	0.397091	1
GO:0005794 Golgi apparatus	0.443557	1
GO:0005730 nucleolus	0.751645	1
GO:0005634 nucleus	0.987923	12

## Sheet: MF F1 v.s. 5035
Molecular function of F1 versus 5035
The enriched GO terms	p-value	overlap(number of annotated genes)
GO:0004497 monooxygenase activity	0.000500845	12
GO:0004334 fumarylacetoacetase activity	0.00358611	2
GO:0016705 oxidoreductase activity, acting on paired donors, with incorporation or reduction of molecular oxygen	0.00445332	11
GO:0003824 catalytic activity	0.00508257	38
GO:0005506 iron ion binding	0.00551885	13
GO:0020037 heme binding	0.00609527	13
GO:0004553 hydrolase activity, hydrolyzing O-glycosyl compounds	0.00959619	12
GO:0005375 copper ion transmembrane transporter activity	0.011409	2
GO:0031176 endo-1,4-beta-xylanase activity	0.011409	2
GO:0016491 oxidoreductase activity	0.0129918	41
GO:0015171 amino acid transmembrane transporter activity	0.0130071	6
GO:0016788 hydrolase activity, acting on ester bonds	0.0136704	4
GO:0016798 hydrolase activity, acting on glycosyl bonds	0.0164398	5
GO:0022857 transmembrane transporter activity	0.0171549	9
GO:0005215 transporter activity	0.0200348	9
GO:0022891 substrate-specific transmembrane transporter activity	0.0339839	7
GO:0004430 1-phosphatidylinositol 4-kinase activity	0.0350687	1
GO:0004851 uroporphyrin-III C-methyltransferase activity	0.0350687	1
GO:0015204 urea transmembrane transporter activity	0.0350687	1
GO:0015489 putrescine transmembrane transporter activity	0.0350687	1
GO:0015606 spermidine transmembrane transporter activity	0.0350687	1
GO:0033229 cysteine transmembrane transporter activity	0.0350687	1
GO:0016884 carbon-nitrogen ligase activity, with glutamine as amido-N-donor	0.0610959	3
GO:0050660 flavin adenine dinucleotide binding	0.0662833	8
GO:0015079 potassium ion transmembrane transporter activity	0.0689137	1
GO:0016433 rRNA (adenine) methyltransferase activity	0.0689137	1
GO:0043115 precorrin-2 dehydrogenase activity	0.0689137	1
GO:0008762 UDP-N-acetylmuramate dehydrogenase activity	0.0715774	4
GO:0008483 transaminase activity	0.0732044	3
GO:0042626 ATPase activity, coupled to transmembrane movement of substances	0.0863437	4
GO:0016614 oxidoreductase activity, acting on CH-OH group of donors	0.0891007	5
GO:0004657 proline dehydrogenase activity	0.101577	1
GO:0004747 ribokinase activity	0.101577	1
GO:0033897 ribonuclease T2 activity	0.101577	1
GO:0033961 cis-stilbene-oxide hydrolase activity	0.101577	1
GO:0004499 N,N-dimethylaniline monooxygenase activity	0.106456	2
GO:0051537 2 iron, 2 sulfur cluster binding	0.129782	2
GO:0008237 metallopeptidase activity	0.130738	3
GO:0003847 1-alkyl-2-acetylglycerophosphocholine esterase activity	0.133101	1
GO:0004356 glutamate-ammonia ligase activity	0.133101	1
GO:0004521 endoribonuclease activity	0.133101	1
GO:0008519 ammonium transmembrane transporter activity	0.133101	1
GO:0016708 oxidoreductase activity, acting on paired donors, with incorporation or reduction of molecular oxygen, NADH or NADPH as one donor, and incorporation of two atoms of oxygen into one donor	0.133101	1
GO:0051536 iron-sulfur cluster binding	0.138808	3
GO:0008236 serine-type peptidase activity	0.155433	3
GO:0016810 hydrolase activity, acting on carbon-nitrogen (but not peptide) bonds	0.155433	3
GO:0003979 UDP-glucose 6-dehydrogenase activity	0.163524	1
GO:0004565 beta-galactosidase activity	0.163524	1
GO:0004713 protein tyrosine kinase activity	0.163524	1
GO:0015238 drug transmembrane transporter activity	0.163524	1
GO:0016787 hydrolase activity	0.164821	23
GO:0030170 pyridoxal phosphate binding	0.177068	5
GO:0004435 phosphatidylinositol phospholipase C activity	0.192885	1
GO:0015297 antiporter activity	0.192885	1
GO:0016813 hydrolase activity, acting on carbon-nitrogen (but not peptide) bonds, in linear amidines	0.192885	1
GO:0004252 serine-type endopeptidase activity	0.199392	3
GO:0004540 ribonuclease activity	0.22122	1
GO:0004620 phospholipase activity	0.22122	1
GO:0005315 inorganic phosphate transmembrane transporter activity	0.22122	1
GO:0015205 nucleobase transmembrane transporter activity	0.22122	1
GO:0030570 pectate lyase activity	0.22122	1
GO:0045735 nutrient reservoir activity	0.22122	1
GO:0008131 primary amine oxidase activity	0.248565	1
GO:0016628 oxidoreductase activity, acting on the CH-CH group of donors, NAD or NADP as acceptor	0.248565	1
GO:0030976 thiamine pyrophosphate binding	0.248565	1
GO:0010181 FMN binding	0.255382	3
GO:0005507 copper ion binding	0.296849	2
GO:0004806 triglyceride lipase activity	0.300423	1
GO:0048038 quinone binding	0.325001	1
GO:0050661 NADP binding	0.336	2
GO:0016887 ATPase activity	0.348274	4
GO:0030145 manganese ion binding	0.348719	1
GO:0030248 cellulose binding	0.348719	1
GO:0016757 transferase activity, transferring glycosyl groups	0.348918	2
GO:0008061 chitin binding	0.371609	1
GO:0008171 O-methyltransferase activity	0.371609	1
GO:0004568 chitinase activity	0.393697	1
GO:0008324 cation transmembrane transporter activity	0.393697	1
GO:0051539 4 iron, 4 sulfur cluster binding	0.415013	1
GO:0008812 choline dehydrogenase activity	0.435584	1
GO:0000155 phosphorelay sensor kinase activity	0.455435	1
GO:0004222 metalloendopeptidase activity	0.493076	1
GO:0008168 methyltransferase activity	0.501851	3
GO:0046873 metal ion transmembrane transporter activity	0.576236	1
GO:0003700 sequence-specific DNA binding transcription factor activity	0.586153	3
GO:0016616 oxidoreductase activity, acting on the CH-OH group of donors, NAD or NADP as acceptor	0.599905	2
GO:0009055 electron carrier activity	0.605564	1
GO:0046872 metal ion binding	0.605604	23
GO:0019829 cation-transporting ATPase activity	0.619462	1
GO:0008081 phosphoric diester hydrolase activity	0.645813	1
GO:0030246 carbohydrate binding	0.645813	1
GO:0003682 chromatin binding	0.658299	1
GO:0016747 transferase activity, transferring acyl groups other than amino-acyl groups	0.670347	1
GO:0017111 nucleoside-triphosphatase activity	0.692576	4
GO:0043565 sequence-specific DNA binding	0.710693	2
GO:0016758 transferase activity, transferring hexosyl groups	0.752694	1
GO:0016620 oxidoreductase activity, acting on the aldehyde or oxo group of donors, NAD or NADP as acceptor	0.761428	1
GO:0051287 NAD binding	0.777986	1
GO:0050662 coenzyme binding	0.785832	1
GO:0003924 GTPase activity	0.807751	1
GO:0000287 magnesium ion binding	0.821108	1
GO:0008080 N-acetyltransferase activity	0.860993	1
GO:0008233 peptidase activity	0.878929	2
GO:0005525 GTP binding	0.892018	2
GO:0000981 sequence-specific DNA binding RNA polymerase II transcription factor activity	0.910437	6
GO:0004672 protein kinase activity	0.934302	2
GO:0004386 helicase activity	0.949488	1
GO:0003723 RNA binding	0.956852	2
GO:0016772 transferase activity, transferring phosphorus-containing groups	0.971496	3
GO:0008270 zinc ion binding	0.975004	15
GO:0016740 transferase activity	0.98505	4
GO:0005524 ATP binding	0.991966	12
GO:0003677 DNA binding	0.996012	7
GO:0000166 nucleotide binding	0.999821	7
GO:0003676 nucleic acid binding	0.999964	1

## Sheet: pathway F1 v.s. 5035
Pathway of F1 versus 5035
The enriched GO terms	p-value	overlap(number of annotated genes)
fgr00350 Tyrosine metabolism	0.014023	2
fgr00620 Pyruvate metabolism	0.014023	2
fgr01100 Metabolic pathways	0.0202766	8
fgr00270 Cysteine and methionine metabolism	0.0209081	2
fgr00511 Other glycan degradation	0.0497764	1
fgr01110 Biosynthesis of secondary metabolites	0.0673026	4
fgr00600 Sphingolipid metabolism	0.0704178	1
fgr00460 Cyanoamino acid metabolism	0.077208	1
fgr00410 beta-Alanine metabolism	0.103925	1
fgr00360 Phenylalanine metabolism	0.123503	1
fgr00860 Porphyrin and chlorophyll metabolism	0.123503	1
fgr00640 Propanoate metabolism	0.136341	1
fgr00500 Starch and sucrose metabolism	0.167698	1
fgr00010 Glycolysis / Gluconeogenesis	0.215742	1
fgr00330 Arginine and proline metabolism	0.215742	1
fgr00380 Tryptophan metabolism	0.215742	1
fgr00260 Glycine, serine and threonine metabolism	0.221569	1

## Sheet: BP F1 v.s. PH1
Biological process of F1 versus PH1
The enriched GO terms	p-value	overlap(number of annotated genes)
GO:0055114 oxidation-reduction process	2.54709e-06	130
GO:0003333 amino acid transmembrane transport	1.46129e-05	16
GO:0055085 transmembrane transport	6.54843e-05	77
GO:0008152 metabolic process	0.000232353	158
GO:0007155 cell adhesion	0.000881848	5
GO:0009116 nucleoside metabolic process	0.00149316	7
GO:0006865 amino acid transport	0.00352575	7
GO:0005975 carbohydrate metabolic process	0.00380095	36
GO:0009405 pathogenesis	0.00798709	4
GO:0006066 alcohol metabolic process	0.0151184	6
GO:0006032 chitin catabolic process	0.028727	4
GO:0015696 ammonium transport	0.0408498	2
GO:0019439 aromatic compound catabolic process	0.0408498	2
GO:0072488 ammonium transmembrane transport	0.0408498	2
GO:0006366 transcription from RNA polymerase II promoter	0.0596463	33
GO:0001172 transcription, RNA-dependent	0.0641787	2
GO:0035434 copper ion transmembrane transport	0.0641787	2
GO:0046677 response to antibiotic	0.0649708	3
GO:0006357 regulation of transcription from RNA polymerase II promoter	0.074993	33
GO:0006233 dTDP biosynthetic process	0.0876736	1
GO:0006661 phosphatidylinositol biosynthetic process	0.0876736	1
GO:0009102 biotin biosynthetic process	0.0876736	1
GO:0015698 inorganic anion transport	0.0876736	1
GO:0015721 bile acid and bile salt transport	0.0876736	1
GO:0015840 urea transport	0.0876736	1
GO:0015847 putrescine transport	0.0876736	1
GO:0015848 spermidine transport	0.0876736	1
GO:0019379 sulfate assimilation, phosphoadenylyl sulfate reduction by phosphoadenylyl-sulfate reductase (thioredoxin)	0.0876736	1
GO:0019740 nitrogen utilization	0.0876736	1
GO:0019836 hemolysis by symbiont of host erythrocytes	0.0876736	1
GO:0031388 organic acid phosphorylation	0.0876736	1
GO:0042128 nitrate assimilation	0.0876736	1
GO:0071918 urea transmembrane transport	0.0876736	1
GO:0097264 self proteolysis	0.0876736	1
GO:0009395 phospholipid catabolic process	0.119934	2
GO:0015851 nucleobase transport	0.119934	2
GO:0009308 amine metabolic process	0.150962	2
GO:0019354 siroheme biosynthetic process	0.167674	1
GO:0007094 mitotic cell cycle spindle assembly checkpoint	0.240673	1
GO:0008610 lipid biosynthetic process	0.240673	1
GO:0015969 guanosine tetraphosphate metabolic process	0.240673	1
GO:0016125 sterol metabolic process	0.240673	1
GO:0048015 phosphatidylinositol-mediated signaling	0.240673	1
GO:0006725 cellular aromatic compound metabolic process	0.250223	2
GO:0006505 GPI anchor metabolic process	0.30728	1
GO:0006694 steroid biosynthetic process	0.30728	1
GO:0006814 sodium ion transport	0.30728	1
GO:0007166 cell surface receptor signaling pathway	0.30728	1
GO:0019344 cysteine biosynthetic process	0.30728	1
GO:0031167 rRNA methylation	0.30728	1
GO:0043419 urea catabolic process	0.30728	1
GO:0006468 protein phosphorylation	0.330563	13
GO:0006508 proteolysis	0.34911	21
GO:0016042 lipid catabolic process	0.350956	2
GO:0000271 polysaccharide biosynthetic process	0.368056	1
GO:0006071 glycerol metabolic process	0.368056	1
GO:0006555 methionine metabolic process	0.368056	1
GO:0006855 drug transmembrane transport	0.368056	1
GO:0019441 tryptophan catabolic process to kynurenine	0.368056	1
GO:0006950 response to stress	0.368681	4
GO:0030245 cellulose catabolic process	0.415606	2
GO:0090502 RNA phosphodiester bond hydrolysis, endonucleolytic	0.415606	2
GO:0045493 xylan catabolic process	0.423509	1
GO:0006526 arginine biosynthetic process	0.474105	1
GO:0006779 porphyrin-containing compound biosynthetic process	0.474105	1
GO:0008272 sulfate transport	0.474105	1
GO:0009396 folic acid-containing compound biosynthetic process	0.474105	1
GO:0046939 nucleotide phosphorylation	0.474105	1
GO:1902358	0.474105	1
GO:0000272 polysaccharide catabolic process	0.489836	4
GO:0006355 regulation of transcription, DNA-dependent	0.495832	37
GO:0030001 metal ion transport	0.496702	3
GO:0006777 Mo-molybdopterin cofactor biosynthetic process	0.520268	1
GO:0006633 fatty acid biosynthetic process	0.560996	2
GO:0006298 mismatch repair	0.562386	1
GO:0071555 cell wall organization	0.562386	1
GO:0000160 phosphorelay signal transduction system	0.586808	2
GO:0006979 response to oxidative stress	0.586808	2
GO:0006696 ergosterol biosynthetic process	0.600813	1
GO:0006810 transport	0.625786	32
GO:0046854 phosphatidylinositol phosphorylation	0.635872	1
GO:0032259 methylation	0.648793	8
GO:0030259 lipid glycosylation	0.667858	1
GO:0006464 cellular protein modification process	0.697039	1
GO:0090501 RNA phosphodiester bond hydrolysis	0.723661	1
GO:0090305 nucleic acid phosphodiester bond hydrolysis	0.736128	2
GO:0009086 methionine biosynthetic process	0.747947	1
GO:0019752 carboxylic acid metabolic process	0.747947	1
GO:0000413 protein peptidyl-prolyl isomerization	0.770103	1
GO:0006289 nucleotide-excision repair	0.790315	1
GO:0016567 protein ubiquitination	0.790315	1
GO:0023014 signal transduction by phosphorylation	0.790315	1
GO:1902600	0.808754	1
GO:0006629 lipid metabolic process	0.824852	4
GO:0016311 dephosphorylation	0.864444	3
GO:0006520 cellular amino acid metabolic process	0.899637	1
GO:0006807 nitrogen compound metabolic process	0.899637	1
GO:0009058 biosynthetic process	0.913034	3
GO:0006351 transcription, DNA-dependent	0.917501	18
GO:0006812 cation transport	0.932177	2
GO:0098655	0.960104	1
GO:0006511 ubiquitin-dependent protein catabolic process	0.969759	1
GO:0007165 signal transduction	0.978715	2
GO:0006457 protein folding	0.980951	1
GO:0007264 small GTPase mediated signal transduction	0.980951	1
GO:0006260 DNA replication	0.986842	1
GO:0006364 rRNA processing	0.990033	1
GO:0006184 GTP catabolic process	0.990914	1
GO:0006886 intracellular protein transport	0.996055	1
GO:0006200 ATP catabolic process	0.997996	4
GO:0006281 DNA repair	0.999535	1
GO:0016310 phosphorylation	0.999914	2

## Sheet: CC F1 v.s. PH1
Cellular component of F1 versus PH1
The enriched GO terms	p-value	overlap(number of annotated genes)
GO:0016021 integral to membrane	3.08581e-13	104
GO:0016020 membrane	1.32857e-05	70
GO:0005576 extracellular region	0.00131052	10
GO:0019028 viral capsid	0.17943	1
GO:0009341 beta-galactosidase complex	0.231813	1
GO:0019008 molybdopterin synthase complex	0.231813	1
GO:0009279 cell outer membrane	0.326808	1
GO:0031461 cullin-RING ubiquitin ligase complex	0.326808	1
GO:0005773 vacuole	0.410111	1
GO:0005774 vacuolar membrane	0.410111	1
GO:0000775 chromosome, centromeric region	0.483155	1
GO:0032040 small-subunit processome	0.547197	1
GO:0005871 kinesin complex	0.576192	1
GO:0005634 nucleus	0.582297	47
GO:0005886 plasma membrane	0.652556	1
GO:0005829 cytosol	0.679837	2
GO:0000139 Golgi membrane	0.715221	1
GO:0005794 Golgi apparatus	0.766634	1
GO:0005783 endoplasmic reticulum	0.923264	2
GO:0005730 nucleolus	0.96851	1
GO:0005622 intracellular	0.99999	1

## Sheet: MF F1 v.s. PH1
Molecular function of F1 versus PH1
The enriched GO terms	p-value	overlap(number of annotated genes)
GO:0043531 ADP binding	1.35484e-07	8
GO:0016491 oxidoreductase activity	5.27672e-06	109
GO:0015171 amino acid transmembrane transporter activity	1.61261e-05	16
GO:0004553 hydrolase activity, hydrolyzing O-glycosyl compounds	0.000273109	28
GO:0016798 hydrolase activity, acting on glycosyl bonds	0.000968395	11
GO:0022857 transmembrane transporter activity	0.00187667	20
GO:0016614 oxidoreductase activity, acting on CH-OH group of donors	0.00208253	14
GO:0051537 2 iron, 2 sulfur cluster binding	0.00341161	6
GO:0022891 substrate-specific transmembrane transporter activity	0.00393766	16
GO:0004497 monooxygenase activity	0.00395951	19
GO:0050660 flavin adenine dinucleotide binding	0.00518883	20
GO:0005506 iron ion binding	0.00581895	25
GO:0020037 heme binding	0.00678599	25
GO:0005215 transporter activity	0.0125455	18
GO:0016772 transferase activity, transferring phosphorus-containing groups	0.012804	27
GO:0016705 oxidoreductase activity, acting on paired donors, with incorporation or reduction of molecular oxygen	0.0140689	19
GO:0008061 chitin binding	0.022614	4
GO:0016884 carbon-nitrogen ligase activity, with glutamine as amido-N-donor	0.0230923	6
GO:0000981 sequence-specific DNA binding RNA polymerase II transcription factor activity	0.0260456	33
GO:0004568 chitinase activity	0.0295017	4
GO:0004252 serine-type endopeptidase activity	0.0365037	8
GO:0051536 iron-sulfur cluster binding	0.0404661	7
GO:0008519 ammonium transmembrane transporter activity	0.0414809	2
GO:0016708 oxidoreductase activity, acting on paired donors, with incorporation or reduction of molecular oxygen, NADH or NADPH as one donor, and incorporation of two atoms of oxygen into one donor	0.0414809	2
GO:0008812 choline dehydrogenase activity	0.0466132	4
GO:0003968 RNA-directed RNA polymerase activity	0.0651386	2
GO:0004565 beta-galactosidase activity	0.0651386	2
GO:0005375 copper ion transmembrane transporter activity	0.0651386	2
GO:0010333 terpene synthase activity	0.0651386	2
GO:0004222 metalloendopeptidase activity	0.0805829	4
GO:0016788 hydrolase activity, acting on ester bonds	0.0842595	5
GO:0004076 biotin synthase activity	0.0883948	1
GO:0004430 1-phosphatidylinositol 4-kinase activity	0.0883948	1
GO:0004604 phosphoadenylyl-sulfate reductase (thioredoxin) activity	0.0883948	1
GO:0004649 poly(ADP-ribose) glycohydrolase activity	0.0883948	1
GO:0004798 thymidylate kinase activity	0.0883948	1
GO:0004851 uroporphyrin-III C-methyltransferase activity	0.0883948	1
GO:0008508 bile acid:sodium symporter activity	0.0883948	1
GO:0008887 glycerate kinase activity	0.0883948	1
GO:0008942 nitrite reductase [NAD(P)H] activity	0.0883948	1
GO:0008998 ribonucleoside-triphosphate reductase activity	0.0883948	1
GO:0015204 urea transmembrane transporter activity	0.0883948	1
GO:0015489 putrescine transmembrane transporter activity	0.0883948	1
GO:0015606 spermidine transmembrane transporter activity	0.0883948	1
GO:0015926 glucosidase activity	0.0883948	1
GO:0016158 3-phytase activity	0.0883948	1
GO:0030791 arsenite methyltransferase activity	0.0883948	1
GO:0043546 molybdopterin cofactor binding	0.0883948	1
GO:0004026 alcohol O-acetyltransferase activity	0.092105	2
GO:0016813 hydrolase activity, acting on carbon-nitrogen (but not peptide) bonds, in linear amidines	0.092105	2
GO:0008762 UDP-N-acetylmuramate dehydrogenase activity	0.097733	7
GO:0008171 O-methyltransferase activity	0.10083	3
GO:0008270 zinc ion binding	0.116828	66
GO:0004620 phospholipase activity	0.121613	2
GO:0015205 nucleobase transmembrane transporter activity	0.121613	2
GO:0045735 nutrient reservoir activity	0.121613	2
GO:0008131 primary amine oxidase activity	0.153004	2
GO:0030976 thiamine pyrophosphate binding	0.153004	2
GO:0004499 N,N-dimethylaniline monooxygenase activity	0.162757	3
GO:0000249 C-22 sterol desaturase activity	0.168991	1
GO:0003854 3-beta-hydroxy-delta5-steroid dehydrogenase activity	0.168991	1
GO:0004371 glycerone kinase activity	0.168991	1
GO:0016433 rRNA (adenine) methyltransferase activity	0.168991	1
GO:0043115 precorrin-2 dehydrogenase activity	0.168991	1
GO:0009055 electron carrier activity	0.192988	4
GO:0008237 metallopeptidase activity	0.208683	5
GO:0016831 carboxy-lyase activity	0.208906	3
GO:0004571 mannosyl-oligosaccharide 1,2-alpha-mannosidase activity	0.219274	2
GO:0030151 molybdenum ion binding	0.219274	2
GO:0008483 transaminase activity	0.231296	4
GO:0004055 argininosuccinate synthase activity	0.242474	1
GO:0004488 methylenetetrahydrofolate dehydrogenase (NADP+) activity	0.242474	1
GO:0033897 ribonuclease T2 activity	0.242474	1
GO:0047750 cholestenol delta-isomerase activity	0.242474	1
GO:0048038 quinone binding	0.253271	2
GO:0016810 hydrolase activity, acting on carbon-nitrogen (but not peptide) bonds	0.259167	5
GO:0010181 FMN binding	0.278106	6
GO:0030248 cellulose binding	0.28737	2
GO:0004672 protein kinase activity	0.290054	13
GO:0005507 copper ion binding	0.291674	4
GO:0003847 1-alkyl-2-acetylglycerophosphocholine esterase activity	0.309472	1
GO:0003950 NAD+ ADP-ribosyltransferase activity	0.309472	1
GO:0004180 carboxypeptidase activity	0.309472	1
GO:0004521 endoribonuclease activity	0.309472	1
GO:0004888 transmembrane signaling receptor activity	0.309472	1
GO:0008271 secondary active sulfate transmembrane transporter activity	0.309472	1
GO:0016805 dipeptidase activity	0.309472	1
GO:0031177 phosphopantetheine binding	0.309472	1
GO:0003993 acid phosphatase activity	0.321286	2
GO:0016811 hydrolase activity, acting on carbon-nitrogen (but not peptide) bonds, in linear amides	0.321286	2
GO:0050662 coenzyme binding	0.330138	5
GO:0030170 pyridoxal phosphate binding	0.335982	9
GO:0050661 NADP binding	0.35382	4
GO:0004519 endonuclease activity	0.354787	2
GO:0046873 metal ion transmembrane transporter activity	0.357554	3
GO:0003979 UDP-glucose 6-dehydrogenase activity	0.370555	1
GO:0004100 chitin synthase activity	0.370555	1
GO:0004659 prenyltransferase activity	0.370555	1
GO:0004713 protein tyrosine kinase activity	0.370555	1
GO:0008239 dipeptidyl-peptidase activity	0.370555	1
GO:0015238 drug transmembrane transporter activity	0.370555	1
GO:0016742 hydroxymethyl-, formyl- and related transferase activity	0.370555	1
GO:0031176 endo-1,4-beta-xylanase activity	0.370555	1
GO:0051539 4 iron, 4 sulfur cluster binding	0.38768	2
GO:0000287 magnesium ion binding	0.420751	5
GO:0004650 polygalacturonase activity	0.426245	1
GO:0015297 antiporter activity	0.426245	1
GO:0016407 acetyltransferase activity	0.426245	1
GO:0016830 carbon-carbon lyase activity	0.426245	1
GO:0031625 ubiquitin protein ligase binding	0.426245	1
GO:0003824 catalytic activity	0.426799	65
GO:0008236 serine-type peptidase activity	0.456725	4
GO:0016758 transferase activity, transferring hexosyl groups	0.456725	4
GO:0046872 metal ion binding	0.466469	61
GO:0016620 oxidoreductase activity, acting on the aldehyde or oxo group of donors, NAD or NADP as acceptor	0.476738	4
GO:0004197 cysteine-type endopeptidase activity	0.477017	1
GO:0004540 ribonuclease activity	0.477017	1
GO:0008199 ferric iron binding	0.477017	1
GO:0015116 sulfate transmembrane transporter activity	0.477017	1
GO:0015299 solute:hydrogen antiporter activity	0.477017	1
GO:0043169 cation binding	0.477017	1
GO:0050525 cutinase activity	0.477017	1
GO:0030246 carbohydrate binding	0.479273	3
GO:0016773 phosphotransferase activity, alcohol group as acceptor	0.502385	3
GO:0016787 hydrolase activity	0.515285	47
GO:0003697 single-stranded DNA binding	0.523305	1
GO:0004096 catalase activity	0.523305	1
GO:0016628 oxidoreductase activity, acting on the CH-CH group of donors, NAD or NADP as acceptor	0.523305	1
GO:0016702 oxidoreductase activity, acting on single donors with incorporation of molecular oxygen, incorporation of two atoms of oxygen	0.523305	1
GO:0030983 mismatched DNA binding	0.523305	1
GO:0008080 N-acetyltransferase activity	0.542855	5
GO:0004185 serine-type carboxypeptidase activity	0.565503	1
GO:0016616 oxidoreductase activity, acting on the CH-OH group of donors, NAD or NADP as acceptor	0.575542	5
GO:0048037 cofactor binding	0.591477	2
GO:0004806 triglyceride lipase activity	0.603973	1
GO:0019239 deaminase activity	0.603973	1
GO:0042626 ATPase activity, coupled to transmembrane movement of substances	0.624019	4
GO:0003995 acyl-CoA dehydrogenase activity	0.639043	1
GO:0016846 carbon-sulfur lyase activity	0.639043	1
GO:0030145 manganese ion binding	0.671013	1
GO:0051287 NAD binding	0.731046	3
GO:0008081 phosphoric diester hydrolase activity	0.740442	2
GO:0003777 microtubule motor activity	0.750942	1
GO:0004177 aminopeptidase activity	0.750942	1
GO:0016747 transferase activity, transferring acyl groups other than amino-acyl groups	0.773479	2
GO:0005509 calcium ion binding	0.786051	3
GO:0000155 phosphorelay sensor kinase activity	0.793139	1
GO:0003755 peptidyl-prolyl cis-trans isomerase activity	0.793139	1
GO:0000156 phosphorelay response regulator activity	0.811481	1
GO:0008168 methyltransferase activity	0.814368	5
GO:0004518 nuclease activity	0.8282	1
GO:0016627 oxidoreductase activity, acting on the CH-CH group of donors	0.8282	1
GO:0016706 oxidoreductase activity, acting on paired donors, with incorporation or reduction of molecular oxygen, 2-oxoglutarate as one donor, and incorporation of one atom each of oxygen into both donors	0.857328	1
GO:0004601 peroxidase activity	0.869987	1
GO:0003700 sequence-specific DNA binding transcription factor activity	0.888399	5
GO:0004190 aspartic-type endopeptidase activity	0.892042	1
GO:0019829 cation-transporting ATPase activity	0.918322	1
GO:0016829 lyase activity	0.926339	3
GO:0003682 chromatin binding	0.938215	1
GO:0016887 ATPase activity	0.950312	4
GO:0043565 sequence-specific DNA binding	0.954115	3
GO:0008233 peptidase activity	0.954408	5
GO:0017111 nucleoside-triphosphatase activity	0.956712	7
GO:0004871 signal transducer activity	0.961213	1
GO:0016757 transferase activity, transferring glycosyl groups	0.961213	1
GO:0003677 DNA binding	0.96952	29
GO:0016853 isomerase activity	0.970672	1
GO:0004674 protein serine/threonine kinase activity	0.991218	3
GO:0005524 ATP binding	0.995948	37
GO:0005525 GTP binding	0.996721	3
GO:0004386 helicase activity	0.999566	1
GO:0003723 RNA binding	0.999961	2
GO:0003676 nucleic acid binding	0.999989	8
GO:0016740 transferase activity	1	4
GO:0000166 nucleotide binding	1	9

## Sheet: pathway F1 v.s. PH1
Pathway of F1 versus PH1
The enriched GO terms	p-value	overlap(number of annotated genes)
fgr01100 Metabolic pathways	0.0021287	20
fgr00500 Starch and sucrose metabolism	0.012791	3
fgr00561 Glycerolipid metabolism	0.0195331	2
fgr00630 Glyoxylate and dicarboxylate metabolism	0.0400326	2
fgr00860 Porphyrin and chlorophyll metabolism	0.049785	2
fgr00910 Nitrogen metabolism	0.049785	2
fgr00562 Inositol phosphate metabolism	0.054954	2
fgr00531 Glycosaminoglycan degradation	0.0597277	1
fgr00592 alpha-Linolenic acid metabolism	0.0597277	1
fgr00780 Biotin metabolism	0.0788611	1
fgr00040 Pentose and glucuronate interconversions	0.116008	1
fgr00590 Arachidonic acid metabolism	0.116008	1
fgr00511 Other glycan degradation	0.134036	1
fgr00790 Folate biosynthesis	0.134036	1
fgr00680 Methane metabolism	0.135784	2
fgr00330 Arginine and proline metabolism	0.142788	2
fgr00260 Glycine, serine and threonine metabolism	0.149872	2
fgr00513 High-mannose type N-glycan biosynthesis	0.151708	1
fgr00565 Ether lipid metabolism	0.169033	1
fgr00600 Sphingolipid metabolism	0.186016	1
fgr00460 Cyanoamino acid metabolism	0.202665	1
fgr00100 Steroid biosynthesis	0.218984	1
fgr00770 Pantothenate and CoA biosynthesis	0.250663	1
fgr00410 beta-Alanine metabolism	0.266034	1
fgr00670 One carbon pool by folate	0.266034	1
fgr00920 Sulfur metabolism	0.266034	1
fgr00360 Phenylalanine metabolism	0.310344	1
fgr01110 Biosynthesis of secondary metabolites	0.311716	6
fgr00052 Galactose metabolism	0.324533	1
fgr00350 Tyrosine metabolism	0.416259	1
fgr00564 Glycerophospholipid metabolism	0.416259	1
fgr00620 Pyruvate metabolism	0.416259	1
fgr00250 Alanine, aspartate and glutamate metabolism	0.42834	1
fgr00510 N-Glycan biosynthesis	0.485214	1
fgr00380 Tryptophan metabolism	0.495915	1
fgr00970 Aminoacyl-tRNA biosynthesis	0.565038	1
fgr04146 Peroxisome	0.565038	1
fgr04113 Meiosis - yeast	0.583045	1
fgr04120 Ubiquitin mediated proteolysis	0.655561	1
fgr00240 Pyrimidine metabolism	0.669938	1
fgr04111 Cell cycle - yeast	0.696976	1
fgr04141 Protein processing in endoplasmic reticulum	0.780584	1

## Sheet: BP PH1 v.s. 5035
Biological process of PH1 versus 5035
The enriched GO terms	p-value	overlap(number of annotated genes)
GO:0008152 metabolic process	7.00736e-07	135
GO:0055114 oxidation-reduction process	9.12863e-07	105
GO:0009116 nucleoside metabolic process	3.17994e-06	9
GO:0003333 amino acid transmembrane transport	0.000229861	12
GO:0006366 transcription from RNA polymerase II promoter	0.00400328	31
GO:0006357 regulation of transcription from RNA polymerase II promoter	0.00545168	31
GO:0006066 alcohol metabolic process	0.0184162	5
GO:0009405 pathogenesis	0.0242979	3
GO:0046677 response to antibiotic	0.031804	3
GO:0001172 transcription, RNA-dependent	0.0381778	2
GO:0009072 aromatic amino acid family metabolic process	0.0381778	2
GO:0006508 proteolysis	0.0491439	21
GO:0006030 chitin metabolic process	0.0661458	1
GO:0006233 dTDP biosynthetic process	0.0661458	1
GO:0015698 inorganic anion transport	0.0661458	1
GO:0015721 bile acid and bile salt transport	0.0661458	1
GO:0019836 hemolysis by symbiont of host erythrocytes	0.0661458	1
GO:0031388 organic acid phosphorylation	0.0661458	1
GO:0042883 cysteine transport	0.0661458	1
GO:0006865 amino acid transport	0.0700079	4
GO:0009395 phospholipid catabolic process	0.0734254	2
GO:0006306 DNA methylation	0.127927	1
GO:0030001 metal ion transport	0.133167	4
GO:0006014 D-ribose metabolic process	0.185631	1
GO:0006562 proline catabolic process	0.185631	1
GO:0007094 mitotic cell cycle spindle assembly checkpoint	0.185631	1
GO:0008610 lipid biosynthetic process	0.185631	1
GO:0015969 guanosine tetraphosphate metabolic process	0.185631	1
GO:0016125 sterol metabolic process	0.185631	1
GO:0031047 gene silencing by RNA	0.185631	1
GO:0042545 cell wall modification	0.185631	1
GO:0006355 regulation of transcription, DNA-dependent	0.208767	32
GO:0006468 protein phosphorylation	0.225064	11
GO:0006032 chitin catabolic process	0.235895	2
GO:0006505 GPI anchor metabolic process	0.239526	1
GO:0006694 steroid biosynthetic process	0.239526	1
GO:0006814 sodium ion transport	0.239526	1
GO:0007166 cell surface receptor signaling pathway	0.239526	1
GO:0000271 polysaccharide biosynthetic process	0.289863	1
GO:0006821 chloride transport	0.289863	1
GO:0009113 purine nucleobase biosynthetic process	0.289863	1
GO:0044070 regulation of anion transport	0.289863	1
GO:0071805 potassium ion transmembrane transport	0.289863	1
GO:0006526 arginine biosynthetic process	0.380785	1
GO:0009396 folic acid-containing compound biosynthetic process	0.380785	1
GO:0015851 nucleobase transport	0.380785	1
GO:0046939 nucleotide phosphorylation	0.380785	1
GO:0055085 transmembrane transport	0.394922	40
GO:0009308 amine metabolic process	0.421794	1
GO:0000160 phosphorelay signal transduction system	0.432604	2
GO:0006979 response to oxidative stress	0.432604	2
GO:0006298 mismatch repair	0.460093	1
GO:0071555 cell wall organization	0.460093	1
GO:0007155 cell adhesion	0.495861	1
GO:0008299 isoprenoid biosynthetic process	0.495861	1
GO:0034220 ion transmembrane transport	0.495861	1
GO:0046835 carbohydrate phosphorylation	0.495861	1
GO:0006807 nitrogen compound metabolic process	0.49972	2
GO:0030259 lipid glycosylation	0.560463	1
GO:0090305 nucleic acid phosphodiester bond hydrolysis	0.580892	2
GO:0006464 cellular protein modification process	0.589597	1
GO:0016042 lipid catabolic process	0.616805	1
GO:0006629 lipid metabolic process	0.619735	4
GO:0019752 carboxylic acid metabolic process	0.642213	1
GO:0005975 carbohydrate metabolic process	0.663554	16
GO:0006950 response to stress	0.683768	2
GO:0006289 nucleotide-excision repair	0.688099	1
GO:0023014 signal transduction by phosphorylation	0.688099	1
GO:0035556 intracellular signal transduction	0.688099	1
GO:0006633 fatty acid biosynthetic process	0.763007	1
GO:0007264 small GTPase mediated signal transduction	0.787815	2
GO:0032259 methylation	0.793605	5
GO:0006351 transcription, DNA-dependent	0.797701	15
GO:0006520 cellular amino acid metabolic process	0.81996	1
GO:0006811 ion transport	0.872344	1
GO:0009058 biosynthetic process	0.919257	2
GO:0006511 ubiquitin-dependent protein catabolic process	0.926408	1
GO:0007165 signal transduction	0.927795	2
GO:0006260 DNA replication	0.960435	1
GO:0006812 cation transport	0.963074	1
GO:0006184 GTP catabolic process	0.969982	1
GO:0016311 dephosphorylation	0.975601	1
GO:0006886 intracellular protein transport	0.983885	1
GO:0006810 transport	0.984837	16
GO:0006281 DNA repair	0.996728	1
GO:0016310 phosphorylation	0.999868	1
GO:0006200 ATP catabolic process	0.9999	1

## Sheet: CC PH1 v.s. 5035
Cellular component of PH1 versus 5035
The enriched GO terms	p-value	overlap(number of annotated genes)
GO:0016021 integral to membrane	0.000161903	56
GO:0005576 extracellular region	0.00104665	8
GO:0016020 membrane	0.00194961	43
GO:0005634 nucleus	0.0757459	38
GO:0009341 beta-galactosidase complex	0.154333	1
GO:0031461 cullin-RING ubiquitin ligase complex	0.222393	1
GO:0005618 cell wall	0.254357	1
GO:0005871 kinesin complex	0.420543	1
GO:0005829 cytosol	0.438657	2
GO:0005783 endoplasmic reticulum	0.933519	1
GO:0005622 intracellular	0.999352	1

[truncated: 10 more sheets: MF PH1 v.s. 5035, pathway PH1 v.s. 5035, BP F1 v.s. (PH1+5035), CC F1 v.s. (PH1+5035), MF F1 v.s. (PH1+5035), pathway F1 v.s. (PH1+5035), BP 5035 v.s. (F1+PH1), CC 5035 v.s. (F1+PH1), MF 5035 v.s. (F1+PH1), pathway 5035 v.s. (F1+PH1)]
