# Supplementary material for: Identification of Candidate Genes Associated with Trichothecene Biosynthesis in Fusarium graminearum Species Complex Combined with Transcriptomic and Proteomic Analysis
Source: Microorganisms. 2022 Jul 22;10(8):1479. doi: 10.3390/microorganisms10081479 (PMC9332169; doi:10.3390/microorganisms10081479)
Supplement: Supplementary file 1 [file microorganisms-10-01479-s001.zip › Table S2.xls]

## Sheet: Sheet1
Table S2. Differentially accumulated protein spots identified in this study from the mycelial proteomes of Fusarium strains.
	Spot no	FGSG	Size (aa)	Annotation or conserved domain	Protein score	Matched peptides	Seq. coverage (%)	Experimental Mr	Theoretical Mr	Location on chromosome	Signal peptidea	TMHsb	SecretomeP prediction scorec
1	A06	FGSG_05218	814	hypothetical protein, Glycosyl hydrolase family 63	90	9	16	109263/5.17	92903.79/4.76	3	Yes	0
2	A09	FGSG_01950	704	heat shock protein Hsp88	103	12	18	95639/5.03	77993.37/4.80	1	No	0	No (0.204)
3	A10	FGSG_05777	746	hypothetical protein, Eukaryotic translation initiation factor 3 subunit B	306	14	20	95214/5.30	85246.69/4.85	3	No	0	No (0.280)
4	A12	FGSG_06706	538	hypothetical protein, Nuclear transport factor 2	75	5	13	89453/4.95	56490.96/4.61	4	No	0	No (0.064)
5	A18	FGSG_07141	552	importin subunit alpha	155	9	18	67279/4.94	60223.23/4.76	4	No	0	No (0.522)
6	A20	FGSG_02717	600	dihydroxy-acid dehydratase	161	8	14	64664/6.42	64462.33/6.45	1	No	0	No (0.516)
7	A26	FGSG_06612	498	hypothetical protein, Cupin 1	93	6	15	57319/4.94	53723.37/4.80	4	Yes	0
8	A32	FGSG_10347	463	hypothetical protein, Isopropylmalate dehydrogenase-like domain	82	9	21	53487/6.04	51884.40/7.90	1	No	0	No (0.399)
9	A34	FGSG_08712	529	fumarate hydratase	138	8	12	51057/6.6	56831.31/9.05	2	No	0	No (0.581)
10	A45	FGSG_11183	166	hypothetical protein, Methyltransferase	130	4	27	40846/4.82	18619.73/6.22	3	No	0	No (0.561)
11	A54	FGSG_07429	325	hypothetical protein, ER membrane protein complex subunit 2-like	104	3	9	38276/4.90	36129.10/4.66	4	No	0	Yes (0.828)
12	A56	FGSG_00554	341	hypothetical protein, Alpha crystallin/Hsp20 domain	218	5	11	37468/5.68	37282.96/5.83	1	No	0	Yes (0.832)
13	A58	FGSG_01523	324	NAD(P)H-dependent D-xylose reductase	179	7	28	36573/5.68	36980.18/5.25	1	No	0	No (0.440)
14	A61	FGSG_06480	320	hypothetical protein, Carbon-nitrogen hydrolase superfamily	189	2	10	35534/5.15	35859.58/5.62	4	No	0	No (0.465)
15	A64	FGSG_01158	214	30 kDa heat shock protein	71	4	14	35072/5.56	24247.46/5.36	1	No	0	Yes (0.818)
16	A67	FGSG_01245	358	cytochrome c peroxidase	564	17	57	34318/6.13	40023.80/8.83	1	No	1
17	A71	FGSG_08452	235	hypothetical protein, 3,4-dihydroxy-2-butanone 4-phosphate synthase	158	10	58	30823/5.02	25302.47/4.68	2	No	0	No (0.504)
18	B02	FGSG_05530	821	cell division cycle protein 48	79	7	8	118552/4.94	90191.41/4.69	3	No	0	No (0.277)
19	B07	FGSG_01950	704	heat shock protein Hsp88	283	16	20	100355/5.10	77993.37/4.80	1	No	0	No (0.204)
20	B08	FGSG_08627	211	riboflavin kinase	92	3	10	98210/5.40	22861.82/4.60	2	No	0	Yes (0.614)
21	B13	FGSG_09998	685	transketolase 1	134	10	18	77310/6.02	74975.49/5.78	1	No	0	No (0.526)
22	B16	FGSG_00838	653	heat shock protein 70	147	9	17	72575/4.80	71124.13/4.72	1	No	0	No (0.233)
23	B18	FGSG_05430	623	phosphatase PP2A regulatory subunit A	218	14	25	69516/4.68	69280.92/4.50	3	No	0	Yes (0.666)
24	B22	FGSG_06761	547	T-complex protein 1 subunit theta	322	13	27	61887/4.95	59530.00/4.77	4	No	0	No (0.489)
25	B23	FGSG_04196	494	succinate-semialdehyde dehydrogenase	181	8	24	58443/6.19	52778.41/6.93	2	No	0	No (0.408)
26	B24	FGSG_09762	467	hypothetical protein, Aldehyde dehydrogenase domain	185	7	24	57140/5.17	51236.49/5.08	4	No	0	No (0.551)
27	B25	FGSG_09762	467	hypothetical protein, Aldehyde dehydrogenase domain	88	6	20	57041/5.26	51236.49/5.08	4	No	0	No (0.551)
28	B28	FGSG_08358	470	homogentisate 1,2-dioxygenase	137	5	9	55963/6.09	51827.35/6.02	2	No	0	No (0.583)
29	B31	FGSG_05858	401	ATP-dependent RNA helicase FAL1	358	12	31	50522/4.88	45567.08/6.18	3	No	0	Yes (0.679)
30	B32	FGSG_05454	409	pyruvate dehydrogenase E1 component subunit alpha	277	16	40	49930/6.29	45288.45/7.21	3	No	0	No (0.317)
31	B39	FGSG_09532	357	hypothetical protein, Inositol monophosphatase-like	421	13	42	40000/5.44	37809.61/5.03	4	No	0	No (0.364)
32	B44	FGSG_03127	333	hypothetical protein, Fructose-1-6-bisphosphatase class I	304	9	35	39359/5.02	36210.13/4.58	2	No	0	No (0.463)
33	B46	FGSG_04223	332	aldehyde reductase 1	215	10	27	38375/6.02	37499.74/6.02	2	No	0	No (0.374)
34	B52	FGSG_08723	323	transaldolase	117	4	12	37973/4.84	35496.44/4.85	2	No	0	No (0.315)
35	B54	FGSG_06480	320	hypothetical protein, Carbon-nitrogen hydrolase	145	8	30	37680/5.25	35859.58/5.62	4	No	0	No (0.465)
36	B55	FGSG_09989	349	MYG1 protein	305	15	42	37654/6.01	38340.97/5.97	1	No	0	No (0.336)
37	B58	FGSG_06257	301	glyceraldehyde-3-phosphate dehydrogenase	166	5	17	37338/6.49	32226.40/6.13	3	No	0	No (0.510)
38	B59	FGSG_02504	331	Malate dehydrogenase	254	9	33	37024/6.72	34535.80/6.88	1	No	0	No (0.577)
39	B63	FGSG_03925	324	hypothetical protein, Chlorophyllase	242	8	30	36739/5.76	35438.09/5.79	2	No	0	No (0.473)
40	B64	FGSG_09494	361	hypothetical protein, Short-chain dehydrogenase/reductase SDR	174	10	22	36713/5.84	38646.17/8.36	4	No	0	Yes (0.716)
41	B70	FGSG_00192	533	cerevisin precursor	70	2	3	35796/6.86	57131.85/6.34	1	Yes	0
42	B80	FGSG_07319	300	hypothetical protein, Fumarylacetoacetase-like	302	10	51	33919/6.72	32106.65/6.87	4	No	0	Yes (0.738)
43	B83	FGSG_05649	254	hypothetical protein, NECAP, Phear domain	320	8	39	32871/4.92	27119.08/4.75	3	No	0	No (0.407)
44	B84	FGSG_13350	274	hypothetical protein	91	4	15	31744/5.69	30907.29/5.42	2	No	0	No (0.472)
45	B87	FGSG_09694	265	hypothetical protein, NAD(P)-binding domain	208	12	49	30764/6.31	28260.09/6.39	4	No	0	No (0.506)
46	B88	FGSG_09639	245	pyridoxamine 5'-phosphate oxidase	70	4	20	30871/6.53	27998.13/6.51	4	No	0	Yes (0.618)
47	B90	FGSG_01832	283	hypothetical protein, Short-chain dehydrogenase/reductase SDR	388	13	43	29918/5.30	30477.96/5.16	1	No	0	No (0.548)
48	B92	FGSG_05757	273	hypothetical protein, Glycoside hydrolase family 16	86	6	21	29400/4.52	29054.42/4.53	3	Yes	0
49	B93	FGSG_04826	266	L-xylulose reductase	234	12	38	28492/6.08	28437.01/5.67	3	No	0	No (0.298)
50	B96	FGSG_03917	281	hypothetical protein, Pyrroline-5-carboxylate reductase	138	4	14	28000/5.50	29180.11/4.99	2	No	1
51	B98	FGSG_01317	253	hypothetical protein, Thioredoxin domain	146	2	9	26572/4.30	27396.94/4.11	1	No	0	Yes (0.628)
52	B99	FGSG_10099	157	hypothetical protein	93	4	12	26434/4.90	16923.96/4.29	1	No	0	Yes (0.790)
53	B100	FGSG_02000	253	hypothetical protein, Glutathione S-transferase	181	9	33	26023/6.94	29191.23/6.93	1	No	0	No (0.381)
54	B109	FGSG_00722	215	adenine phosphoribosyltransferase	189	9	28	23473/4.87	22720.07/4.73	1	No	0	Yes (0.730)
55	B111	FGSG_08624	215	hypothetical protein, Methyltransferase	171	9	47	22975/5.28	23056.96/5.28	2	No	0	Yes (0.783)
56	B113	FGSG_02051	212	superoxide dismutase	77	3	17	22548/5.71	23266.18/6.38	1	No	0	No (0.455)
57	B122	FGSG_01403	204	hypothetical protein, NADPH-dependent FMN reductase-like	90	4	35	21892/5.48	21809.56/5.99	1	No	0	No (0.560)
58	B123	FGSG_01866	205	hypothetical protein, Nitroreductase	387	7	39	21601/5.81	22712.73/5.81	1	No	0	No (0.556)
59	B125	FGSG_01403	204	hypothetical protein, NADPH-dependent FMN reductase-like	287	3	26	21342/5.75	21809.56/5.99	1	No	0	No (0.560)
60	B127	FGSG_01746	193	hypothetical protein, Isochorismatase-like	240	3	16	21058/5.00	20495.28/4.89	1	No	0	No (0.482)
61	B128	FGSG_06150	171	peroxiredoxin HYR1	94	6	47	19069/5.88	19126.90/6.38	3	No	0	No (0.469)
62	B134	FGSG_03422	176	hypothetical protein, Phenolic acid decarboxylase	178	6	31	15574/5.39	20400.88/5.59	2	No	0	No (0.419)
63	B136	FGSG_08675	162	hypothetical protein, Nascent polypeptide-associated complex NAC domain	144	6	54	15081/5.86	17766.06/5.85	2	No	0	No (0.474)
64	B139	FGSG_12955	165	ATP synthase subunit delta	235	3	24	12817/4.80	17726.17/5.65	4	No	0	Yes (0.782)
65	C25	FGSG_09834	570	pyruvate decarboxylase	399	22	48	61742/5.89	63010.65/5.76	4	No	0	No (0.526)
66	C29	FGSG_06798	433	histone acetyltransferase type B subunit 2	112	4	15	57414/4.80	48932.22/4.72	4	No	0	No (0.562)
67	C36	FGSG_09204	402	metacaspase-1 precursor	177	5	17	44930/5.03	43760.52/4.88	4	No	0	Yes (0.702)
68	C37	FGSG_09321	396	acetyl-CoA acetyltransferase IB	277	9	27	44308/6.17	41189.24/6.06	4	No	0	No (0.513)
69	C40	FGSG_00554	341	hypothetical protein, Alpha crystallin/Hsp20 domain	76	5	21	42099/4.92	37282.96/5.83	1	No	0	Yes (0.832)
70	C59	FGSG_06480	320	hypothetical protein, Carbon-nitrogen hydrolase	138	5	21	36804/5.23	35859.58/5.62	4	No	0	No (0.465)
71	D19	FGSG_01705	521	hypothetical protein, Band 7 domain	284	22	44	62396/6.08	57461.48/5.90	1	No	0	No (0.500)
72	D20	FGSG_03619	470	hypothetical protein	97	6	17	62297/4.75	52739.43/4.45	2	No	0	No (0.424)
73	D31	FGSG_00175	393	2-methylcitrate synthase	144	7	21	49019/6.69	43620.60/6.23	1	No	0	No (0.555)
74	D42	FGSG_12851	360	allantoicase	166	11	27	40000/5.98	39830.82/5.82	3	No	0	No (0.468)
75	D97	FGSG_10024	429	hypothetical protein	80	15	22	23426/6.56	48893.18/7.94	1	No	0	No (0.239)
76	D101	FGSG_02051	212	superoxide dismutase	255	5	28	22393/5.98	23266.18/6.38	1	No	0	No (0.455)
77	D104	FGSG_01403	204	hypothetical protein, NADPH-dependent FMN reductase-like	347	7	55	21548/5.98	21809.56/5.99	1	No	0	No (0.560)
a Presence of signal peptide (Y/N) as predicted by SignalP
b Probable transmembrane domains determined by TMHMM
c Where SignalP prediction was negative, non-classical secretion was predicted (Y/N) using SecretomeP (Mammalian, threshold>0.6)
