# Supplementary material for: Identification of Candidate Genes Associated with Trichothecene Biosynthesis in Fusarium graminearum Species Complex Combined with Transcriptomic and Proteomic Analysis
Source: Microorganisms. 2022 Jul 22;10(8):1479. doi: 10.3390/microorganisms10081479 (PMC9332169; doi:10.3390/microorganisms10081479)
Supplement: Supplementary file 1 [file microorganisms-10-01479-s001.zip › Table S3.xls]

## Sheet: Sheet1
Table S3. Primers used in this study.
Primer name	Sequence (5'-3')
01403-1F	AGAGCAGTGTCAGGTTCAGAG
01403-2R	TTGACCTCCACTAGCTCCAGCCAAGCCAGAGATGGGAATACGAGAAGAGG
01403-3F	GAATAGAGTAGATGCCGACCGCGGGTTAACAAGGGACCACAAGAACTCA
01403-4R	CTCGCATCATCACGAAAGGC
01403-NF	AAGACGAGGAACGGTGAATAGC
01403-NR	TCTAGCAGTGACAATCTTGGAGTG
01403-JDF1	CGGAACTGGCAACATGGTAA
01403-JDR1	TCTCACAGGAGTAACAGAGGATAT
01403-JDF2	GTGAGACGTTGGACTTTGCC
01403-JDR2	ATGATGCCGTGGTGGGTG
YGF	GATGTAGGAGGGCGTGGATATGTCCT
HYR	GTATTGACCGATTCCTTGCGGTCCGAA
Fg16F	CTCCGGATATGTTGCGTCAA
Fg16R	GGTAGGTATCCGACATGGCAA
TEF-F	CTTAACGTCGTCGTCATCG
TEF-R	CACTTGGTGGTGTCCATCTT
ProbeOF	TGGACTTTGCCATACATCGC
ProbeOR	GTCTCCTGACCACCACCCTG
ProbeHF	TTCAGCGAGAGCCTGACCTA
ProbeHR	ACCAATGCGGAGCATATACG
Tub-F	CGTCCAGAGCAAGAACTCATCA
Tub-R	TGCGTCGGAACATAGCAGTAA
TRI1-F	GAAGATTCCTGAAGGTCCCG
TRI1-R	TGTACCAATTCCAATCGCAGAC
TRI3-F	CTTGCAGGGATATCAAGAAATGTTACGA
TRI3-R	CTCGCCTGTTGTAGTTCGCTTGATTT
TRI4-F	TCGAGGCACAACAGAAGGGTATCC
TRI4-R	AATGTCGGCCTTGGTGGTGTC
TRI5-F	CCAGGAAACCCTACACTCGTCTAAG
TRI5-R	TGGCCGCCTGCTCAAAGAAC
TRI6-F	GGCATTACCGGCAACACTTCAA
TRI6-R	CATGTTATCCACCCTGCTAAAGACC
TRI8-F	GCTCTTCTTAACCAAGAGGG
TRI8-R	GTAGATGTCCAAAAGCCACT
TRI10-F	GTGGCCGGGACGCTTCAAT
TRI10-R	ATCCGTCAAGTCTTCCCATCTCAT
TRI11-F	AAGTACTTCACCCGACCAAACGAC
TRI11-R	CGGCAAGGCGAATGTCAAAC
TRI12-F	ATCCCCGCAGTCATTCAGA
TRI12-R	CGCAATCATAGCCACTACACC
TRI101-F	GTGGGACTCTGGGATTACGACTTT
TRI101-R	GTCCACTCCTTATCCGCCTTCAA
