# Supplementary material for: Identification of Candidate Genes Associated with Trichothecene Biosynthesis in Fusarium graminearum Species Complex Combined with Transcriptomic and Proteomic Analysis
Source: Microorganisms. 2022 Jul 22;10(8):1479. doi: 10.3390/microorganisms10081479 (PMC9332169; doi:10.3390/microorganisms10081479)
Supplement: Supplementary file 1 [file microorganisms-10-01479-s001.zip › Table S4.xls]

## Sheet: Sheet1
Table S4. The gen list associated with trichothecene production identified in this study.
Number	Accession no.	Chromosomal location	DNA size (bp)	Protein (aa)	Identified by
1	FGSG_06480	4	1048	320	transcriptomic and proteomic
2	FGSG_01158	1	1258	214	transcriptomic and proteomic
3	FGSG_09762	4	1404	467	transcriptomic and proteomic
4	FGSG_01832	1	852	283	transcriptomic and proteomic
5	FGSG_01950	1	2520	704	transcriptomic and proteomic
6	FGSG_01523	1	1512	324	transcriptomic and proteomic
7	FGSG_07319	4	1038	300	transcriptomic and proteomic
8	FGSG_09694	4	971	265	transcriptomic and proteomic
9	FGSG_05430	3	2265	623	transcriptomic and proteomic
10	FGSG_09834	4	2027	570	transcriptomic and proteomic
11	FGSG_09321	4	1438	396	transcriptomic and proteomic
12	FGSG_01705	1	1836	521	transcriptomic and proteomic
13	FGSG_02051	1	1036	212	transcriptomic and proteomic
14	FGSG_11183	3	988	166	transcriptomic and proteomic
15	FGSG_00554	1	1359	341	transcriptomic and proteomic
16	FGSG_03127	2	1002	333	transcriptomic and proteomic
17	FGSG_01403	1	1466	204	proteomic
18	FGSG_10571	1	1572	523	proteomic
19	FGSG_01959	1	2738	536	proteomic
20	FGSG_09786	4	3331	692	proteomic
21	FGSG_03796	2	1566	521	proteomic
22	FGSG_02367	1	1188	395	proteomic
23	FGSG_07765	4	1521	506	proteomic
24	FGSG_01786	1	1515	504	proteomic
25	FGSG_02113	1	1980	659	proteomic
26	FGSG_02366	1	1599	532	proteomic
27	FGSG_02371	1	1401	466	proteomic
